# Supplementary material for: Expression Profile of Ectopic Olfactory Receptors Determined by Deep Sequencing
Source: PubMed Central journal article supplement (PMC3566163; doi:10.1371/journal.pone.0055368), 2013-02-06

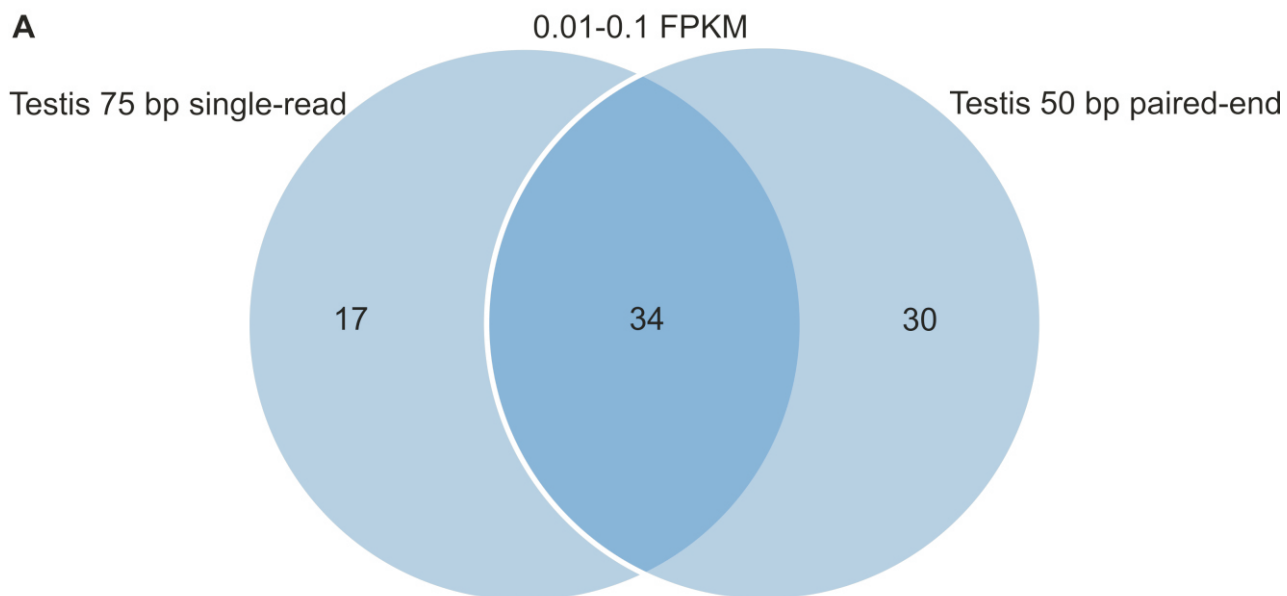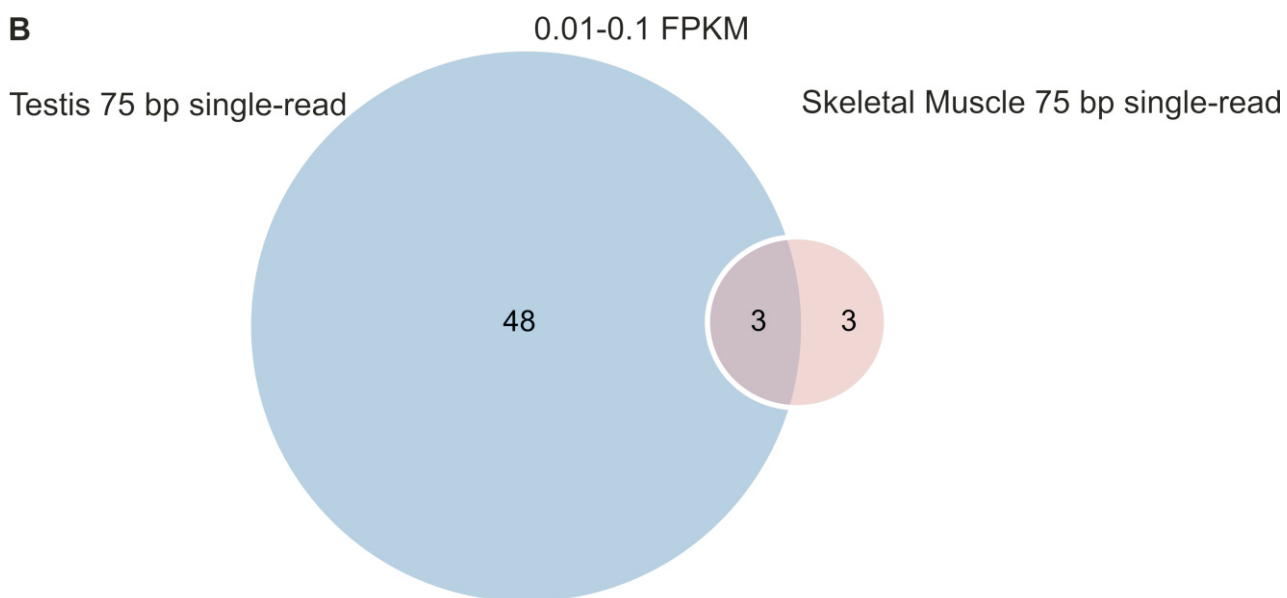

Supplement: pone.0055368.s004.pdf [file pone.0055368.s004.pdf]
