# Supplementary material for: Expression Profile of Ectopic Olfactory Receptors Determined by Deep Sequencing
Source: PubMed Central journal article supplement (PMC3566163; doi:10.1371/journal.pone.0055368), 2013-02-06
Supplement: pone.0055368.s007.pdf [file pone.0055368.s007.pdf]

## OR2W3 - Trim58 in lung

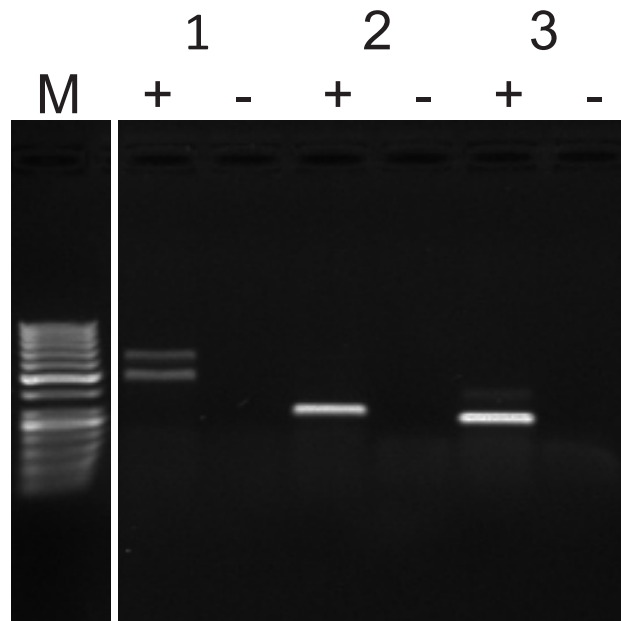

- 1: fwd primer in exon 3 of Trim58  
rv primer in OR2W3
- 2: fwd primer in exon 4 of Trim58  
rv primer in OR2W3
- 3: fwd primer in exon 5 of Trim58  
rv primer in OR2W3
