# Supplementary material for: Expression Profile of Ectopic Olfactory Receptors Determined by Deep Sequencing
Source: PubMed Central journal article supplement (PMC3566163; doi:10.1371/journal.pone.0055368), 2013-02-06
Supplement: pone.0055368.s010.pdf [file pone.0055368.s010.pdf]

| OR           | M<br>50<br>bp | Brain |               | Breast |               | Colon |      | Kidney |      | Lung |      | Testis |               |   |
|--------------|---------------|-------|---------------|--------|---------------|-------|------|--------|------|------|------|--------|---------------|---|
|              |               | +     | -             | +      | -             | +     | -    | +      | -    | +    | -    | +      | -             |   |
| 1C1          | 250 bp        |       |               |        |               |       |      |        |      |      |      |        |               |   |
|              | FPKM          |       | 0             | 0      | 0             | 0     | 0    | 0      | 0    | 0    | 0    | 0      | 1.09          | 0 |
| 1E1          | 250 bp        |       |               |        |               |       |      |        |      |      |      |        |               |   |
|              | FPKM          |       | 0             | 0      | 0.31          | 0     | 0    | 0      | 0    | 0    | 0    | 0      | 0.1           | 0 |
| 1F1          | 300 bp        |       |               |        |               |       |      |        |      |      |      |        |               |   |
|              | FPKM          |       | 0.39          | 0      | 0             | 0     | 0    | 0      | 0    | 0    | 0    | 0      | 0.1           | 0 |
| 1L8          | 250 bp        |       |               |        |               |       |      |        |      |      |      |        |               |   |
|              | FPKM          |       | 0.27          | 0      | 0             | 0     | 0    | 0.10   | 0    | 0    | 0    | 0      | 0.15          | 0 |
| 2A1/<br>2A42 | 250 bp        |       |               |        |               |       |      |        |      |      |      |        |               |   |
|              | FPKM          |       | 0             | 0      | 0.29          | 0     | 0.35 | 0      | 0.31 | 0    | 0.43 | 0      | 0.18          | 0 |
| 2A4/<br>2A7  | 250 bp        |       |               |        |               |       |      |        |      |      |      |        |               |   |
|              | FPKM          |       | 0             | 0      | 0.12          | 0     | 0.12 | 0      | 0.52 | 0    | 0.16 | 0      | 0.16          | 0 |
| 2C3          | 250 bp        |       |               |        |               |       |      |        |      |      |      |        |               |   |
|              | FPKM          |       | 0             | 0      | 0.14          | 0     | 0    | 0      | 0    | 0    | 0    | 0      | 0.49          | 0 |
| 2H1/<br>2H2  | 250 bp        |       |               |        |               |       |      |        |      |      |      |        |               |   |
|              | FPKM          |       | 0/<br>0.25    | 0      | 0/            | 0     | 0/   | 0      | 0/   | 0    | 0/   | 0      | 1.04/<br>0.51 | 0 |
| 2K2          | 250 bp        |       |               |        |               |       |      |        |      |      |      |        |               |   |
|              | FPKM          |       | 0.14          | 0      | 0.10          | 0     | 0    | 0      | 0    | 0    | 0    | 0      | 0.29          | 0 |
| 2L13         | 200 bp        |       |               |        |               |       |      |        |      |      |      |        |               |   |
|              | FPKM          |       | 0.65          | 0      | 0             | 0     | 0.24 | 0      | 0    | 0    | 0    | 0      | 0             | 0 |
| 2W3          | 200 bp        |       |               |        |               |       |      |        |      |      |      |        |               |   |
|              | FPKM          |       | 0.42          | 0      | 0             | 0     | 0.10 | 0      | 0    | 0    | 1.95 | 0      | 1.04          | 0 |
| 3A2/<br>3A3  | 250 bp        |       |               |        |               |       |      |        |      |      |      |        |               |   |
|              | FPKM          |       | 0.11/<br>0.12 | 0      | 0.18/<br>0.19 | 0     | 0/   | 0      | 0/   | 0    | 0/   | 0      | 1.12/<br>0.36 | 0 |

| OR            | M<br>50<br>bp | Brain         |   | Breast     |   | Colon   |   | Kidney     |   | Lung    |   | Testis        |   |
|---------------|---------------|---------------|---|------------|---|---------|---|------------|---|---------|---|---------------|---|
|               |               | +             | - | +          | - | +       | - | +          | - | +       | - | +             | - |
| 4N4/<br>4N3P  | 250 bp        |               |   |            |   |         |   |            |   |         |   |               |   |
|               | FPKM          | 0.02/<br>0.02 |   | 0/<br>0    |   | 0/<br>0 |   | 0/<br>0    |   | 0/<br>0 |   | 9.85/<br>1.62 |   |
| 5K2           | 250 bp        |               |   |            |   |         |   |            |   |         |   |               |   |
|               | FPKM          | 0.1           |   | 0.21       |   | 0.1     |   | 0.1        |   | 0.04    |   | 0             |   |
| 7A5           | 250 bp        |               |   |            |   |         |   |            |   |         |   |               |   |
|               | FPKM          | 0.30          |   | 0.1        |   | 0.02    |   | 0          |   | 0       |   | 0.28          |   |
| 7C1           | 300 bp        |               |   |            |   |         |   |            |   |         |   |               |   |
|               | FPKM          | 0.13          |   | 0          |   | 0.04    |   | 0          |   | 0       |   | 0.70          |   |
| 8D1           | 250 bp        |               |   |            |   |         |   |            |   |         |   |               |   |
|               | FPKM          | 0             |   | 0.18       |   | 0       |   | 0          |   | 0       |   | 0.58          |   |
| 10A2/<br>10A5 | 250 bp        |               |   |            |   |         |   |            |   |         |   |               |   |
|               | FPKM          | 0.16/<br>0    |   | 0.13/<br>0 |   | 0/<br>0 |   | 0.13/<br>0 |   | 0/<br>0 |   | 0.1/<br>0.06  |   |
| 10AD1         | 200 bp        |               |   |            |   |         |   |            |   |         |   |               |   |
|               | FPKM          | 0.25          |   | 0.1        |   | 0       |   | 0          |   | 0       |   | 0.17          |   |
| 13J1          | 250 bp        |               |   |            |   |         |   |            |   |         |   |               |   |
|               | FPKM          | 0.64          |   | 0          |   | 0       |   | 0          |   | 0       |   | 0             |   |
| 51E1          | 250 bp        |               |   |            |   |         |   |            |   |         |   |               |   |
|               | FPKM          | 0.15          |   | 1.72       |   | 0.12    |   | 0.55       |   | 0       |   | 0.28          |   |
| 51E2          | 250 bp        |               |   |            |   |         |   |            |   |         |   |               |   |
|               | FPKM          | 0.04          |   | 0.28       |   | 2.36    |   | 0.26       |   | 0.15    |   | 0.17          |   |
| 52D1          | 150 bp        |               |   |            |   |         |   |            |   |         |   |               |   |
|               | FPKM          | 0             |   | 0          |   | 0       |   | 0          |   | 0.04    |   | 0.53          |   |
| 52N4          | 250 bp        |               |   |            |   |         |   |            |   |         |   |               |   |
|               | FPKM          | 0.03          |   | 0.03       |   | 0       |   | 0          |   | 0.34    |   | 0.17          |   |
| 56B1          | 250 bp        |               |   |            |   |         |   |            |   |         |   |               |   |
|               | FPKM          | 0.08          |   | 0.06       |   | 0       |   | 0.13       |   | 0.06    |   | 0             |   |
