# Supplementary material for: Expression Profile of Ectopic Olfactory Receptors Determined by Deep Sequencing
Source: PubMed Central journal article supplement (PMC3566163; doi:10.1371/journal.pone.0055368), 2013-02-06
Supplement: pone.0055368.s011.pdf [file pone.0055368.s011.pdf]

| Gene                 | Primer Sequence          | Product Size (bp) |
|----------------------|--------------------------|-------------------|
| OR10A2/5 fwd         | CCCTGCTTGCCCAGGACACA     | 200               |
| OR10A2/5 rev         | GAACCAGGAGGCAGCAGCCA     |                   |
| OR10AD1 fwd          | ACTGCCTGGTTCTTTGGGCTGA   | 120               |
| OR10AD1 rev          | GCCAATCACTATGGGGCCTCA    |                   |
| OR13J1 fwd           | CTGGCCATCTGCCAGCCACT     | 206               |
| OR13J1 rev           | GTGTTGCCGCATGCCAGCTT     |                   |
| OR1C1 fwd            | TTTGCAGGCTGCCTCACCCA     | 197               |
| OR1C1 rev            | TGCAGGAGGGCGTGGAGGTA     |                   |
| OR1E1 fwd            | CCATCCCCTATGCGGACTGCC    | 188               |
| OR1E1 rev            | GGTGGTCAGCACCCAGGACAG    |                   |
| OR1F1 fwd            | GGCCACTGTCCTGGGGAACC     | 275               |
| OR1F1 rev            | GGCACACGGCGACAAAGTGG     |                   |
| OR1L8 fwd            | GGCCATTGCTTCAACCCCC      | 298               |
| OR1L8 rev            | GGCCACCAGCAGGACACAGT     |                   |
| OR2A1/42 fwd         | CCTGCTCCTCCCACCTCTGC     | 199               |
| OR2A1/42 rev         | CCCAGTGTCTCCTCAGGGC      |                   |
| OR2A4/7 fwd          | GGTGCCCGGATGCTGGTG       | 157               |
| OR2A4/7 rev          | GGGGTGGCAGATGGCCACG      |                   |
| OR2C3 fwd            | CCCTTCTGGACATGAGCTTACC   | 151               |
| OR2C3 rev            | TGGCCAGCAGGACACACTCG     |                   |
| OR2H1/2 fwd          | GCCCAGGCAGTGCTGAGGAT     | 155               |
| OR2H1/2 rev          | AACTTGCCCTCCCTTGGGC      |                   |
| OR2K2 fwd            | GTGTGTGCTCCTGGCCGTGAT    | 146               |
| OR2K2 rev            | TTCCAGCAGAGCGGTCAGGC     |                   |
| OR2L13 fwd           | CGGTGGGTAACTCGGCCATGA    | 133               |
| OR2L13 rev           | TACGCCATCTTGGGGACGGTG    |                   |
| OR2W3 fwd            | CTGCCGGGGCTTGGTGTGAG     | 105               |
| OR2W3 rev            | TCCACCTCGTGGTGCCACA      |                   |
| OR3A2/3 fwd          | TGGCAGCCGTCTTGGTGGAG     | 229               |
| OR3A2/3 rev          | CGGTTCATAGCCATGGCGGT     |                   |
| OR4N3P/4 fwd         | CCGCTTGCCTTTTTGTGGCCC    | 233               |
| OR4N3P/4 rev         | TGGTGCACGTGGACATGGCC     |                   |
| OR51E1 fwd           | CCGCCATTGGCCTGGACTION    | 213               |
| OR51E1 rev           | CCAAGATGACGGGCAGCGGA     |                   |
| OR51E2 fwd           | CCCAGATTGGCATCGTGGCTG    | 201               |
| OR51E2 rev           | CGCCCATGACCAGCAGAATGG    |                   |
| OR52D1 fwd           | TCTGAGTACCTGTGGCTCCAC    | 78                |
| OR52D1 rev           | CGGTGGGTGAGGAAGGAGAAGA   |                   |
| OR52N4 fwd           | CCAAGCTCCTGCCCTACTGC     | 226               |
| OR52N4 rev           | AAGGCCTTCTGCCGAGCATC     |                   |
| OR56B1 fwd           | GCCAAGGCCCTGAGCACTTGTA   | 222               |
| OR56B1 rev           | GGCAAACAGCACCTTTTGGAAAGG |                   |
| OR5K2 fwd            | AGATGACCACAGGCGCCTTCA    | 284               |
| OR5K2 rev            | GGCTTTGGCCCTTCCCTCCT     |                   |
| OR7A5 fwd            | CAGTTGCGCTGCTGGGTGGA     | 200               |
| OR7A5 rev            | TGAGTTGCGGGTGGCAGCAG     |                   |
| OR7C1 fwd            | TGAACCCCAGCTCTGTGGAC     | 220               |
| OR7C1 rev            | ATCACACCCAGGACGCCAGTT    |                   |
| OR7D2 fwd            | ACCCACCTCTGTGGCCTC       | 216               |
| OR7D2 rev            | AAACGCCACGACACCCGTC      |                   |
| OR8D1 fwd            | ACTGCTAGTGCTGGCTGCCT     | 285               |
| OR8D1 rev            | GCTTTGGACCGGCCCTCTGA     |                   |
| OR2A7/loc728377 fwd  | TCCCTTCTCCTCCATTGGGGG    | 409               |
| OR2A7/loc728377 rev  | TCGACGACCGCCAGGTGTGA     |                   |
| OR2W3/Trim58 Ex3 fwd | AGTTTGAGAAGCATCGTGGC     | 500               |
| OR2W3/Trim58 Ex4 fwd | TGTGAGAGGAGTCTGTGACAG    |                   |
| OR2W3/Trim58 Ex5 fwd | GGCTGGAAGCAGAGAACATC     |                   |
| OR2W3/Trim58 rev     | AGGTACGCGATCAGGATGAC     |                   |
| OR4N4/loc727924 fwd  | GTCACAGACAGAACATTGGCACCT |                   |
| OR4N4/loc727924 rev  | TCCACCAACATCCTGGGAGCCA   | 200               |
| OR7E14P/Plekha7 fwd  | CGGGGAGCCCGTCAACTCG      |                   |
| OR7E14P/Plekha7 rev  | TGGACAGGAACAGCCAGCGA     |                   |
