# Supplementary material for: Expression Profile of Ectopic Olfactory Receptors Determined by Deep Sequencing
Source: PubMed Central journal article supplement (PMC3566163; doi:10.1371/journal.pone.0055368), 2013-02-06

## The 40 most highly ectopically expressed ORs

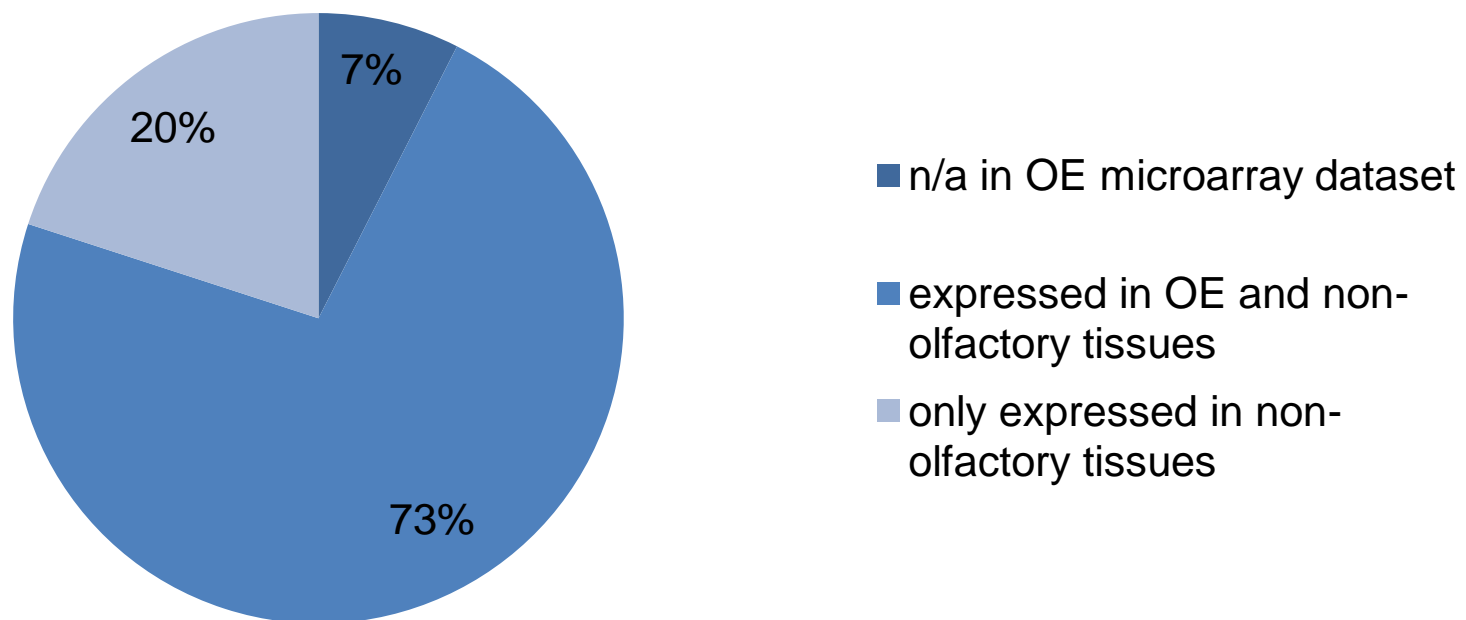

Supplement: pone.0055368.s012.pdf [file pone.0055368.s012.pdf]
